# Supplementary material for: Electrochemical studies of hydrogen chloride gas in several room temperature ionic liquids: mechanism and sensing
Source: Royal Society of Chemistry journal article supplement (doi:10.1039/c5cp06656e), 2015-12-17
Supplement: c5cp06656e1.pdf [file c5cp06656e1.pdf]

**Electronic Supplementary Information for**  
**Electrochemical Studies of Hydrogen Chloride Gas in Several Room**  
**Temperature Ionic Liquids: Mechanism and Sensing**

Krishnan Murugappan, Debbie S. Silvester\*

Nanochemistry Research Institute, Department of Chemistry, Curtin University, GPO Box  
U1987, Perth, 6845, Australia.

*Submitted to Phys. Chem. Chem. Phys.*

---

\* To whom correspondence should be addressed.

Email: D.Silvester-Dean@curtin.edu.au

## Figure legends

Figure S1: NMR spectra for a)  $^{19}\text{F}$ , b)  $^1\text{H}$  and c)  $^{31}\text{P}$  in  $[\text{C}_4\text{mim}][\text{PF}_6]$  before and after experiments with  $\text{HCl}$ .  $^1\text{H}$  Spectra shows the formation of hydrogen bonds after experiments due to features at 11 ppm.  $^{19}\text{F}$  and  $^{31}\text{P}$  spectra shows that the ratio of P and F before and after experiments have changed, possibility due to the formation of  $\text{HF}$  and  $\text{PF}_{6-n}$  where n is less than 6.

Figure S2: CVs for the oxidation (first scan) of 2.56 % hydrogen chloride gas on a  $8.3\ \mu\text{m}$  radius Pt electrode in a)  $[\text{C}_2\text{mim}][\text{NTf}_2]$ , b)  $[\text{C}_4\text{mim}][\text{NTf}_2]$ , c)  $[\text{C}_6\text{mim}][\text{FAP}]$ , d)  $[\text{C}_4\text{mpyrr}][\text{NTf}_2]$ , e)  $[\text{C}_4\text{mim}][\text{BF}_4]$ , f)  $[\text{C}_4\text{mim}][\text{PF}_6]$  at various scan rates between 0.05-2 V/s. The labels for peaks (I) to (V) are not included for  $[\text{C}_4\text{mim}][\text{PF}_6]$  (f) due to different reactions occurring in this RTIL.

Figure S3: Plots of currents vs square root of scan rate in  $[\text{C}_2\text{mim}][\text{NTf}_2]$  on a Pt microelectrode (diameter  $8.3\ \mu\text{m}$ ) for a)  $[\text{HCl}_2]^-$  oxidation during first scan, b)  $[\text{HCl}_2]^-$  oxidation during second scan, c)  $\text{H}^+$  reduction and d)  $\text{Cl}^-$  oxidation.

Figure S4: Plots of current vs square root of scan rate in  $[\text{C}_4\text{mim}][\text{NTf}_2]$  on a Pt microelectrode (diameter  $8.3\ \mu\text{m}$ ) for a)  $[\text{HCl}_2]^-$  oxidation during first scan, b)  $[\text{HCl}_2]^-$  oxidation during second scan, c)  $\text{H}^+$  reduction and d)  $\text{Cl}^-$  oxidation.

Figure S5: Plots of current vs square root of scan rate in  $[\text{C}_4\text{mpyrr}][\text{NTf}_2]$  on a Pt microelectrode (diameter  $8.3\ \mu\text{m}$ ) for a)  $[\text{HCl}_2]^-$  oxidation during first scan, b)  $[\text{HCl}_2]^-$  oxidation during second scan, c)  $\text{H}^+$  reduction and d)  $\text{Cl}^-$  oxidation.

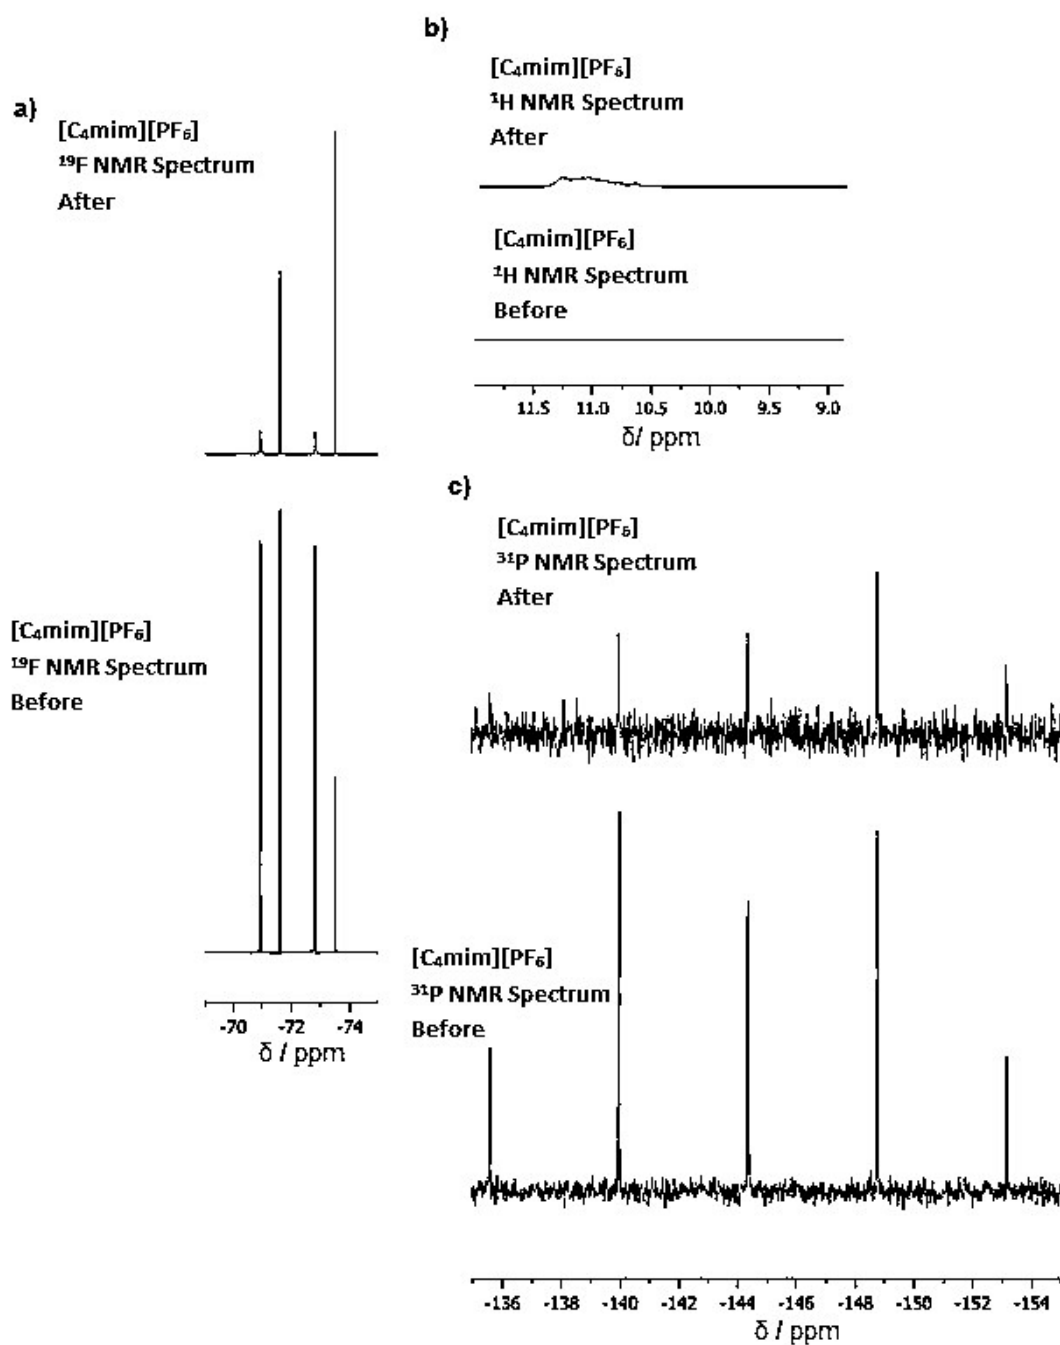

Figure S1: NMR spectra for a)  $^{19}\text{F}$ , b)  $^1\text{H}$  and c)  $^{31}\text{P}$  in  $[\text{C}_4\text{mim}][\text{PF}_6]$  before and after experiments with HCl.  $^1\text{H}$  Spectra shows the formation of hydrogen bonds after experiments due to features at 11 ppm.  $^{19}\text{F}$  and  $^{31}\text{P}$  spectra shows that the ratio of P and F before and after experiments have changed, possibility due to the formation of HF and  $\text{PF}_{6-n}$  where n is less than 6

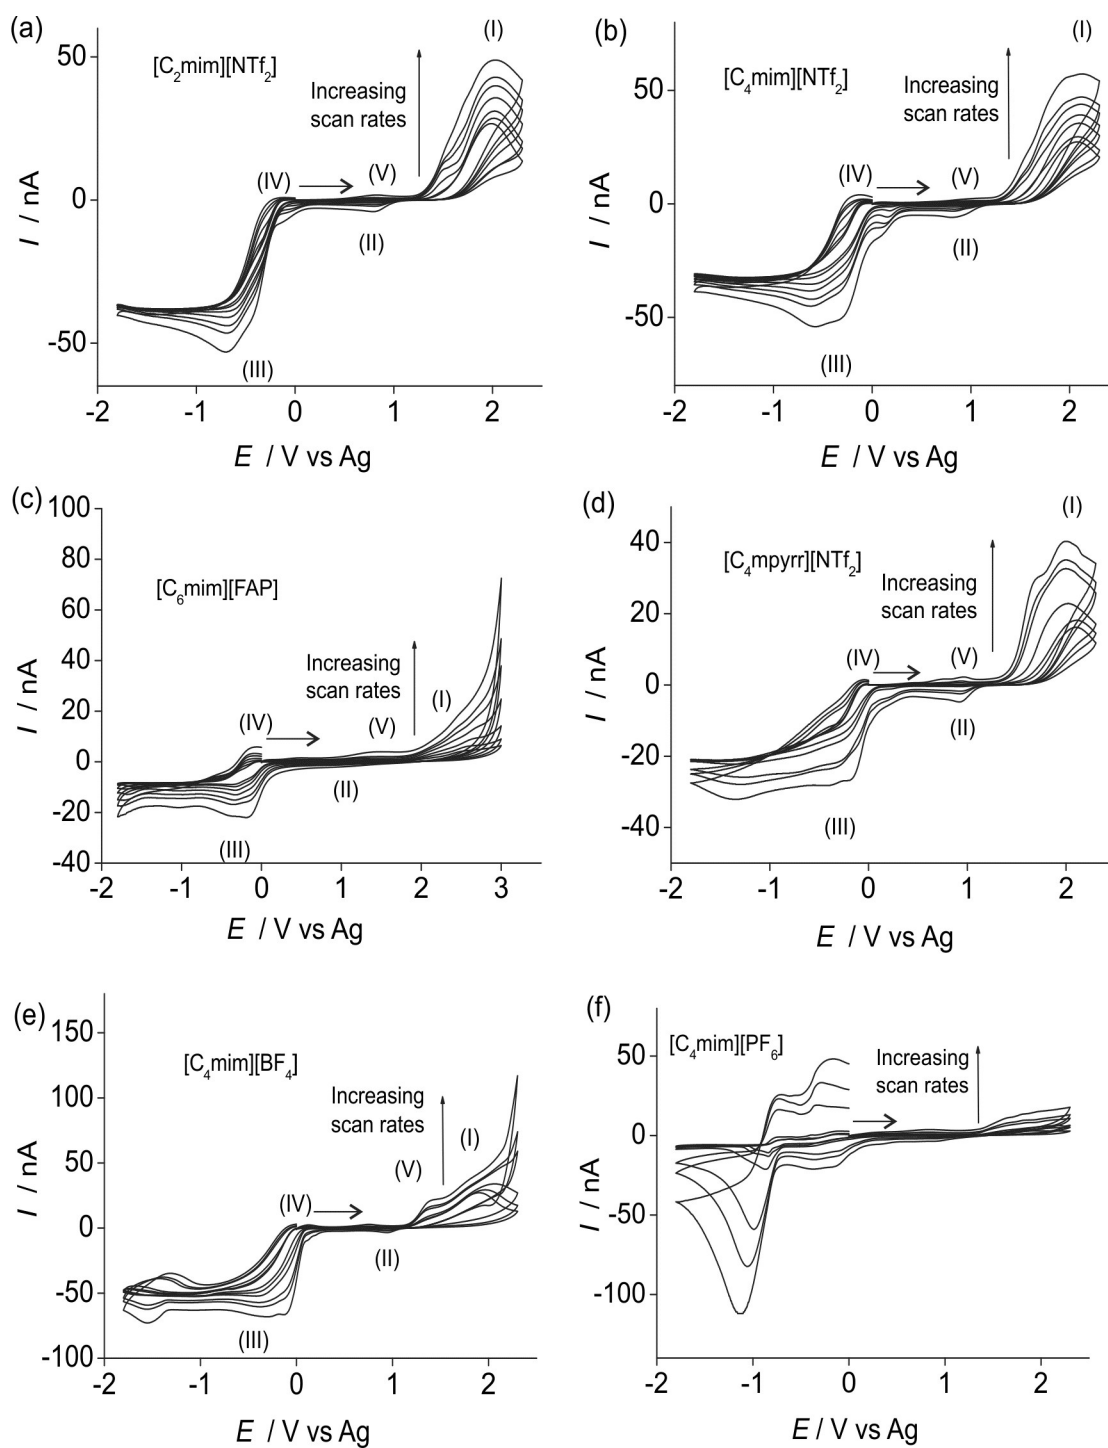

Figure S2: CVs for the oxidation (first scan) of 2.56 % hydrogen chloride gas on a 8.3  $\mu\text{m}$  radius Pt electrode in a)  $[C_2mim][NTf_2]$ , b)  $[C_4mim][NTf_2]$ , c)  $[C_6mim][FAP]$ , d)  $[C_4mpyrr][NTf_2]$ , e)  $[C_4mim][BF_4]$ , f)  $[C_4mim][PF_6]$  at various scan rates between 0.05-2 V/s. The labels for peaks (I) to (V) are not included for  $[C_4mim][PF_6]$  (f) due to different reactions occurring in this RTIL.

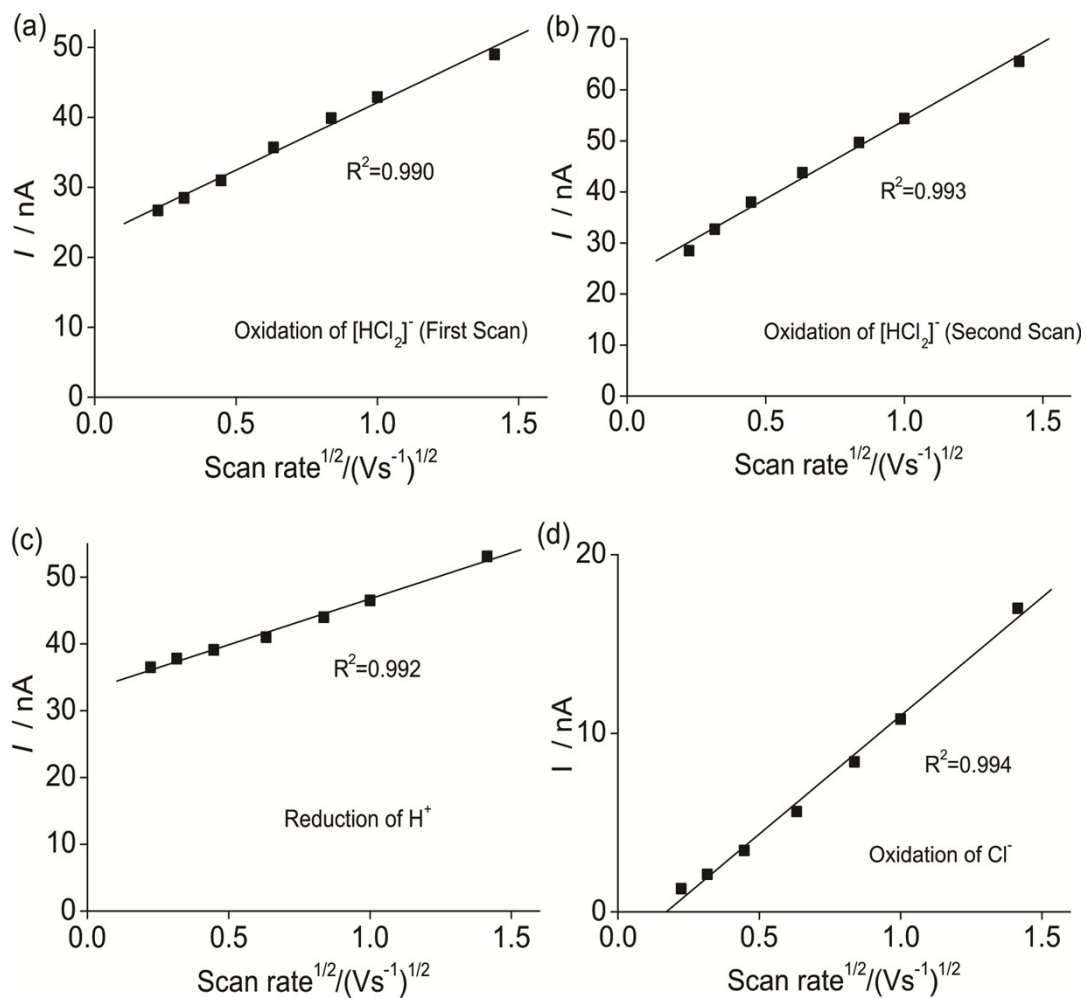

Figure S3: Plots of current vs square root of scan rate in  $[\text{C}_2\text{mim}][\text{NTf}_2]$  on a Pt microelectrode (diameter  $8.3 \mu\text{m}$ ) for a)  $[\text{HCl}_2]^-$  oxidation during first scan, b)  $[\text{HCl}_2]^-$  oxidation during second scan, c)  $\text{H}^+$  reduction and d)  $\text{Cl}^-$  oxidation.

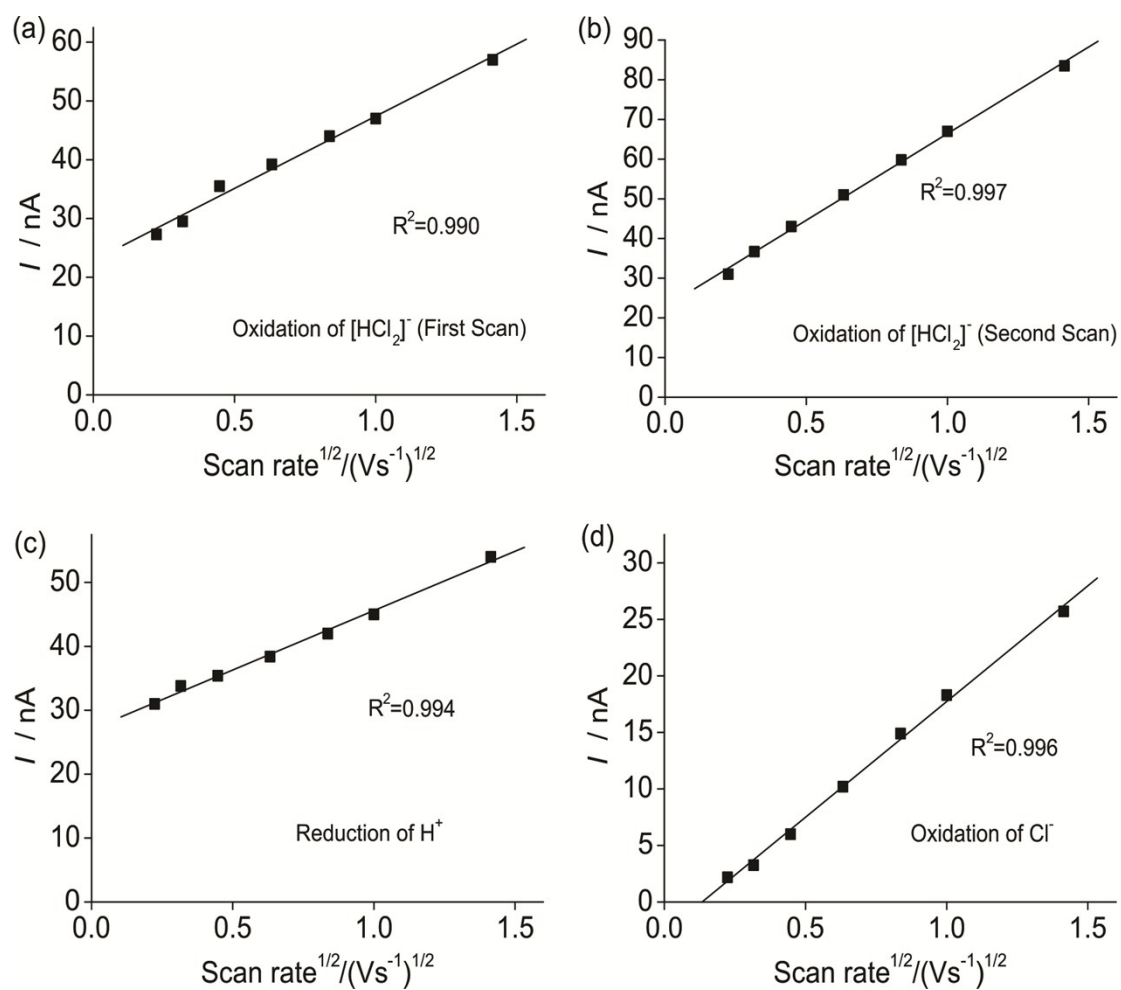

Figure S4: Plots of current vs square root of scan rate in  $[\text{C}_4\text{mim}][\text{NTf}_2]$  on a Pt microelectrode (diameter  $8.3 \mu\text{m}$ ) for a)  $[\text{HCl}_2]^-$  oxidation during first scan, b)  $[\text{HCl}_2]^-$  oxidation during second scan, c)  $\text{H}^+$  reduction and d)  $\text{Cl}^-$  oxidation.

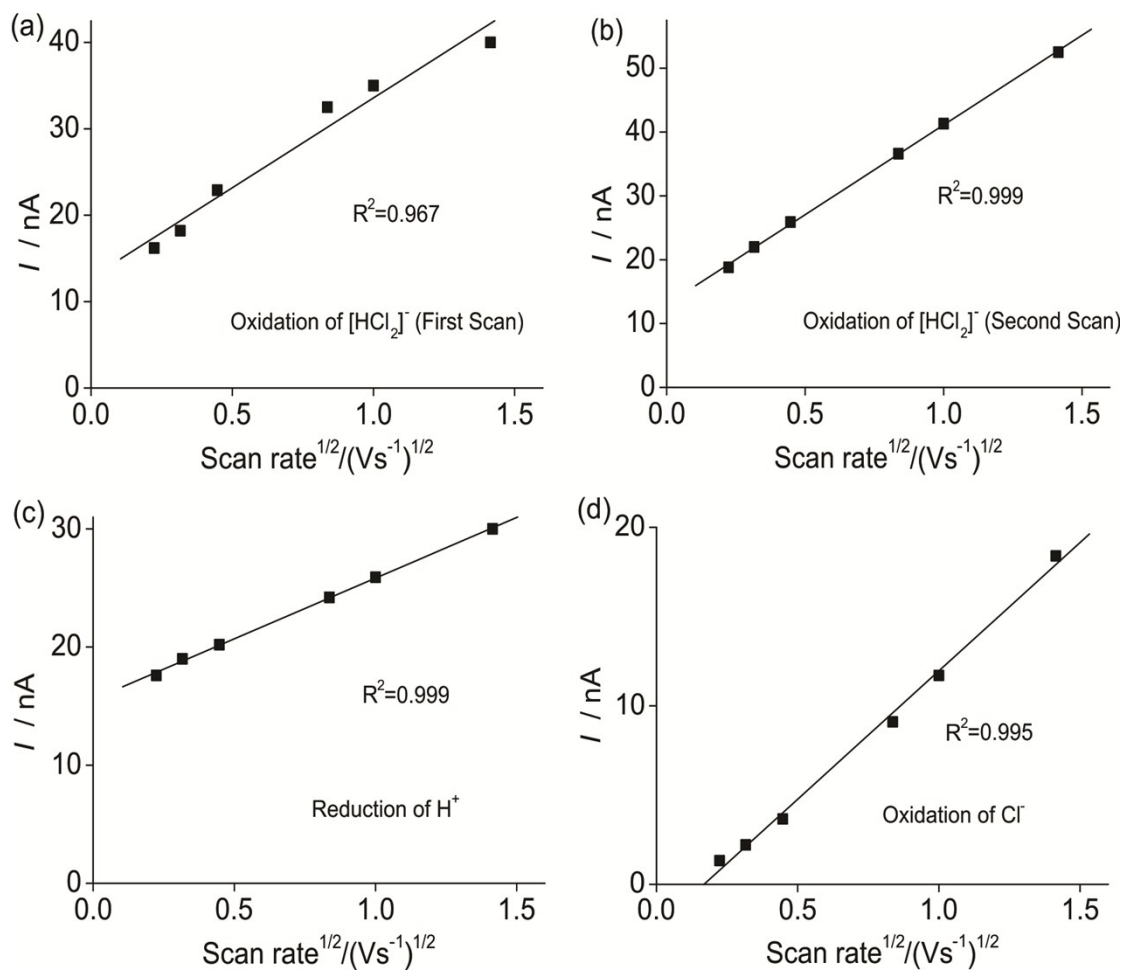

Figure S5: Plots of current vs square root of scan rate in  $[\text{C}_4\text{mpyr}][\text{NTf}_2]$  on a Pt microelectrode (diameter  $8.3 \mu\text{m}$ ) for a)  $[\text{HCl}_2]^-$  oxidation during first scan, b)  $[\text{HCl}_2]^-$  oxidation during second scan, c)  $\text{H}^+$  reduction and d)  $\text{Cl}^-$  oxidation.
